# Supplementary material for: Protein crystal quality oriented disulfide bond engineering
Source: PubMed Central journal article supplement (PMC6019659; doi:10.1007/s13238-017-0482-7), 2017-10-16
Supplement: 13238_2017_482_MOESM1_ESM.pdf [file 13238_2017_482_MOESM1_ESM.pdf]

**Supplementary Figure 1 | The geometric characterization of disulfide bond.** A-F, distribution of distances between two paired atoms from disulfide-linked cysteines: C atoms (A),  $C_\alpha$  atoms (B),  $C_\beta$  atoms (C), Nitrogen atoms (D), oxygen atoms (E), sulfur atoms (F). According to the optimal dihedral angle ( $C_\beta-S_\gamma-S_\gamma'-C_\beta'$ ) of  $90^\circ$ , the  $C_\beta$  distance distribution is very narrow ( $3.5\sim 4.0$  Å), providing a better constrain for disulfide prediction (1C). The distances of the O atoms ( $7.0\sim 9.0$  Å) are less broadly distributed compared with N distances, which could provide extract restrain for the backbone conformation in prediction algorithm. Due to the lack of characteristic distributions, the distance profiles between paired  $C_\alpha$ , C and N are less useful in disulfide bond prediction. G-I, the arc length of dihedral angle between planes of  $C/C_\alpha/C_\beta$  (G),  $C_\alpha/C_\beta/N$  (H),  $C/C_\alpha/N$  (I) from each paired cysteine.

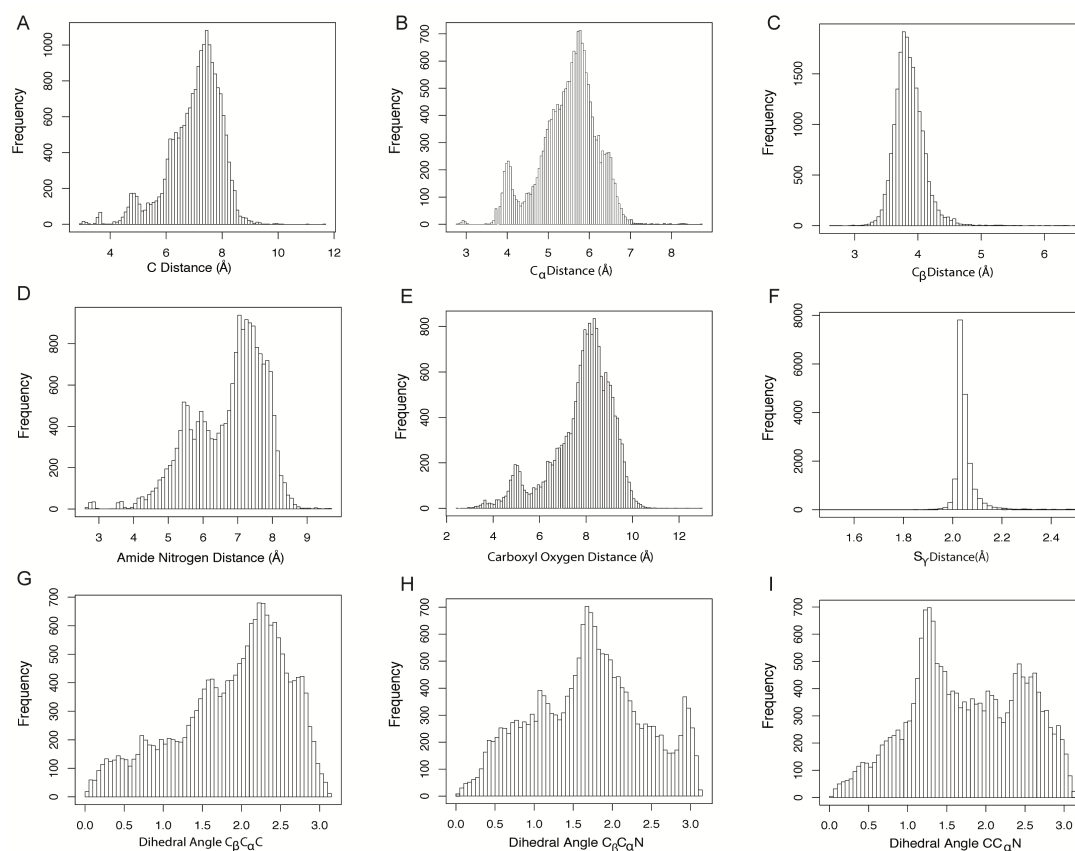

**Supplementary Figure 2 | The distribution of  $\chi$  angles and DSE.** A-E, the  $\chi$  angles ( $\chi_1$ ,  $\chi_2$ ,  $\chi_3$ ,  $\chi_2'$  and  $\chi_1'$ ) are rotation angles around the five bonds indicated in the schema  $\text{C}\alpha\text{-C}\beta\text{-S}\gamma\text{-S}\gamma'\text{-C}\beta'\text{-C}\alpha'$ , respectively,  $\chi_1$  (A),  $\chi_2$  (B),  $\chi_3$  (C),  $\chi_2'$  (D),  $\chi_1'$  (E). F, the DSE distributions.

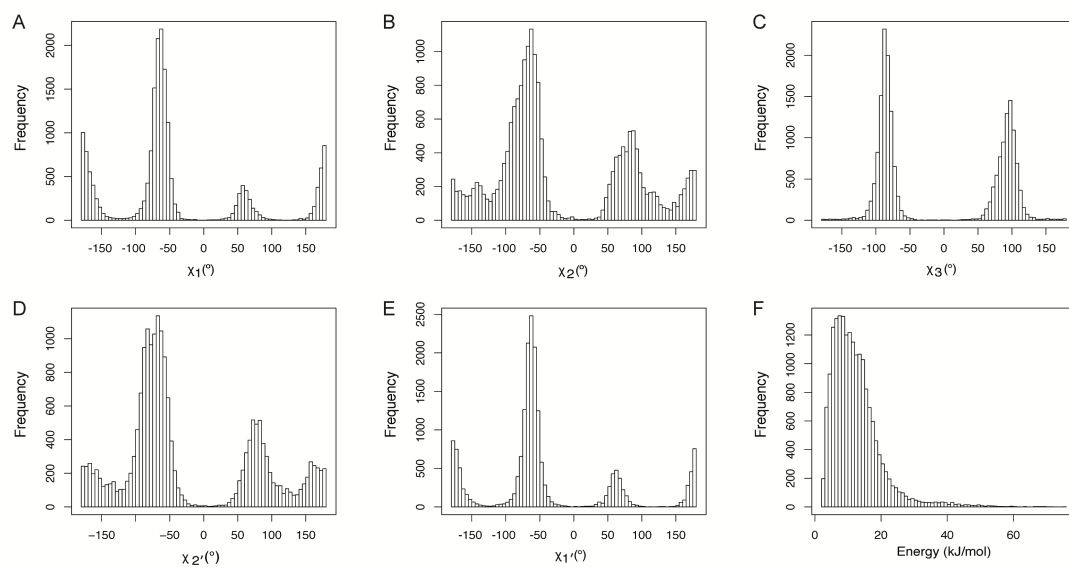

**Supplementary Figure 3 | Analysis of environment of disulfide bond.** A, statistics of buried and exposed sulfur atoms of disulfide bonds. B, The preference of residues near the disulfide bond. In horizontal axis, amino acids are classified in order: basic amino acid, acidic amino acid, polar amino acid, non-polar amino acid. Residues within 5 Å distance from disulfide sulfurs were calculated. The ratio of exposed to buried is 63/37 (3A). The disulfide linked cysteines are mostly surrounded by nonpolar residues, such as leucine, valine, proline, phenylalanine, and tyrosine (3B). These residues accommodate or cover the disulfide bonds by creating a hydrophobic environment.

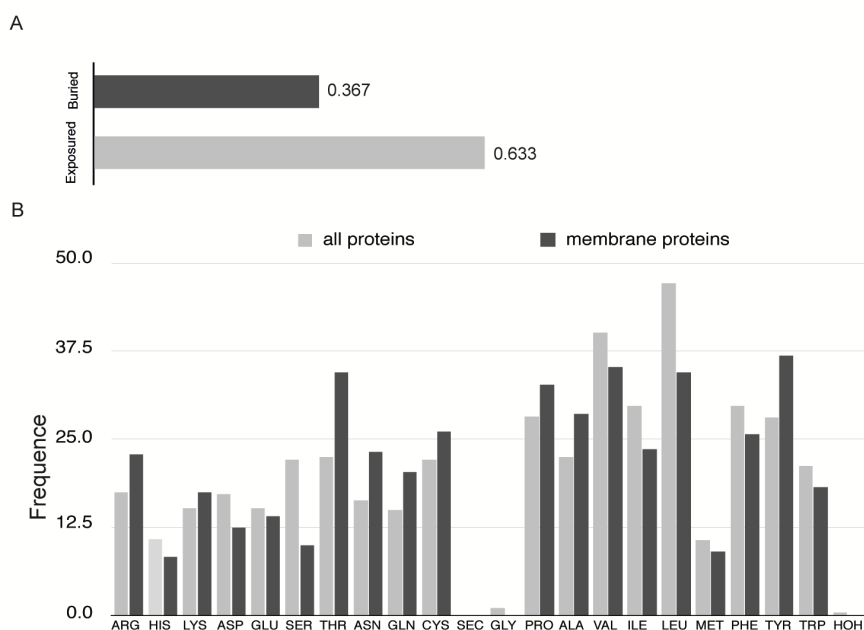

**Supplementary Figure 4 | Stability of the proteins from simulations.** A, B, Average deviations from crystals structures compared to model resolution for BRIL proteins (A) and Flavodoxin proteins (B). C, D, The average B-factors from simulations and crystal structures for BRIL proteins (C) and Flavodoxin proteins (D). E, F, The distances between two termini of BRIL proteins (E) and Flavodoxin proteins (F). The red columes are the average values computed from simulation trajectories (standard deviation is indicated with error bar), and the yellow columes shows the value measured from crystal structures. G, H, The structural entropy from simulation trajectories of the Bril proteins (G) and Flavodoxin proteins (H) The red columes are structrual entropy computed by Quasi-Harmonic approximation.

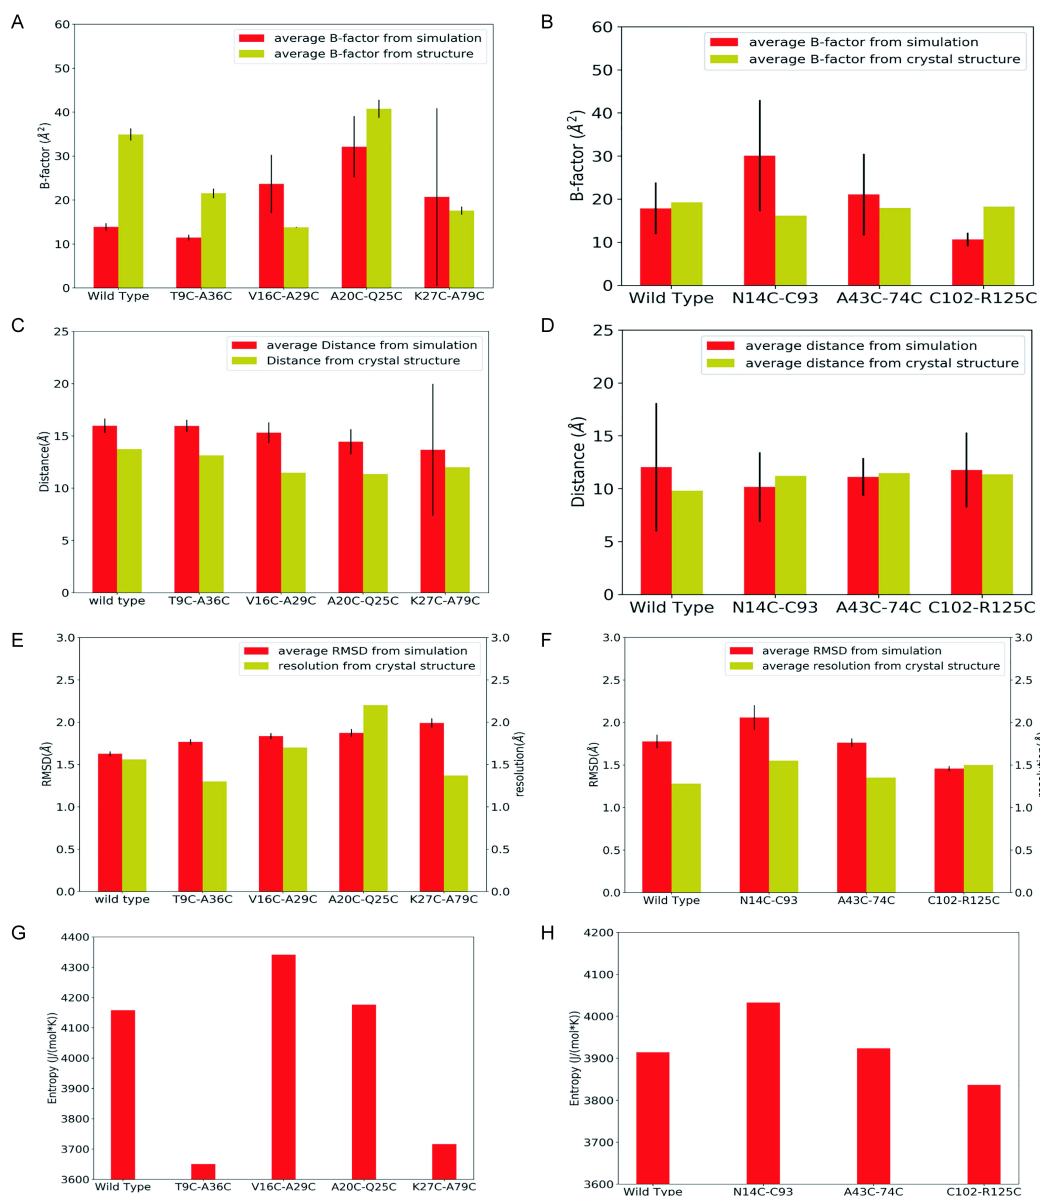

**Supplementary Figure 5 | Prediction of disulfide bonds on unknown structure.** A, Thermo-SEC characterization of the disulfide I317C-G361C construct. The purified proteins (apo) of I317C-G361C and the control (no mutation) were both kept at 37°C for 5 min and then loaded to the size exclusion chromatography. B, Crystal structure of GLP-1R and the electron densities around the engineered disulfide bonds.

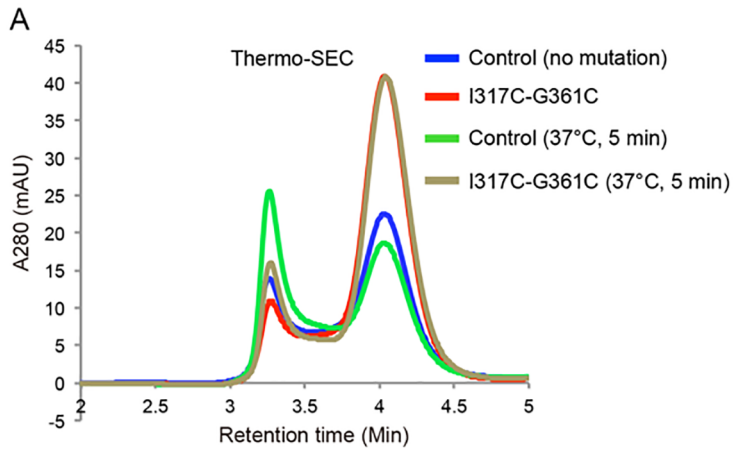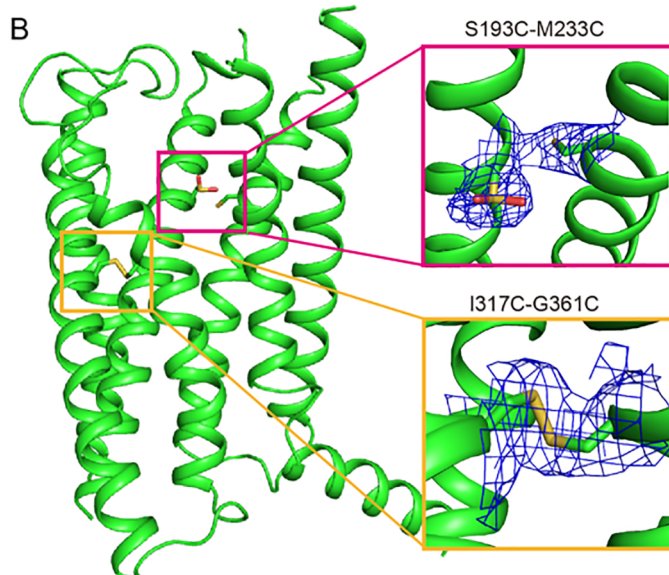

**Supplementary table 1| Prediction of disulfide bonds on BRIL and Flavodoxin.**

|               | Mutant site (mutate to cysteine) | Probability (%) |
|---------------|----------------------------------|-----------------|
| BRIL-WT       | —                                |                 |
| Q41C-F65C     | 41 GLN 65 PHE                    | 27.04           |
| A75C-A90C     | 75 ALA 90 ALA                    | 26.17           |
| A20C-Q25C     | 20 ALA 25 GLN                    | 6.90            |
| L78C-A87C     | 78 LEU 87 ALA                    | 6.01            |
| T9C-A36C      | 9 THR 36 ALA                     | 0.93            |
| V16C-A29C     | 16 VAL 29 ALA                    | 0.62            |
| K51C-S55C     | 51 LYS 55 SER                    | 0.59            |
| A79C-A87C     | 79 ALA 87 ALA                    | 0.58            |
| K27C-A79C     | 27 LYS 79 ALA                    | 0.13            |
| S52C-S55C     | 52 SER 55 SER                    | 0.10            |
| Flavodoxin-WT | —                                |                 |
| R125C-102C    | 125 ARG 102 CYS                  | 24.00           |
| F50C-L5C      | 50 PHE 5 LEU                     | 5.40            |
| A104C-T59C    | 104 ALA 59 THR                   | 5.40            |
| F101C-S96C    | 101 PHE 96 SER                   | 4.50            |
| N14C-93C      | 14 ASN 93 CYS                    | 1.40            |
| A43C-L74C     | 43 ALA 74 LEU                    | 1.20            |
| A104C-57C     | 104 ALA 57 CYS                   | 1.20            |
| L67C-A104C    | 67 LEU 104 ALA                   | 1.10            |

**Supplementary Table 2| The results of BRIL and its mutants based on LC/MS.**

| Label     | Molecular weight (MD) <sup>a</sup> | Detected MD <sup>b</sup> | Detected MD (with DTDP) <sup>c</sup> | Formed disulfide bond | DbD <sup>d</sup> |
|-----------|------------------------------------|--------------------------|--------------------------------------|-----------------------|------------------|
| BRIL      | 11855.29                           | 11855.78                 | 11855.72                             | -                     |                  |
| Q41C-F65C | 11786.27                           | 11784.69                 | 11784.37                             | YES                   | YES              |
| A75C-A90C | 11919.43                           | 11919.36                 | 11917.49,12137.75                    | NO                    | YES              |
| T9C-A36C  | 11889.40                           | 11887.64                 | 11887.53                             | YES                   | YES              |
| V16C-A29C | 11891.37                           | 11889.55                 | 11889.52                             | YES                   | NO               |
| L78C-A87C | 11877.34                           | 11875.44                 | 11875.40                             | YES                   | YES              |
| A20C-Q25C | 11862.37                           | 11860.50                 | 11860.45                             | YES                   | NO               |
| K51C-S55C | 11846.33                           | 11845.75                 | 11844.47,12064.60                    | NO                    | YES              |
| A79C-A87C | 11919.43                           | 11919.49                 | 11917.56,12137.81                    | NO                    | YES              |
| K27C-A79C | 11862.33                           | 11861.99                 | 11860.48                             | YES                   | NO               |
| S52C-S55C | 11887.43                           | 11887.76                 | 11886.50,12105.84                    | NO                    | YES              |

Molecular weight of DTDP is 220.3139.

a: The molecular weight of BRIL and mutants with an extra serine in its amino terminal.

b: MD after mutated to cysteine and supposed that mutants didn't form disulfide bond

c: The detected MD by MS experiment.

d: Disulfide by Design, a web-based, platform-independent application for prediction of disulfide bond

**Supplementary table 3| Prediction of disulfide bonds on unsolved protein GLP-1R**

| Protein                  | Mutant site (mutate to cysteine) |         | Probability (%) |
|--------------------------|----------------------------------|---------|-----------------|
| GLP-1R                   |                                  |         |                 |
| S193C-M233C              | 193 SER                          | 233 MET | 78.40           |
| L183C-W243C              | 183 LEU                          | 243 TRP | 47.10           |
| A162C-403C               | 162 ALA                          | 403 CYS | 46.00           |
| S352C-L401C              | 352 SER                          | 401 LEU | 24.60           |
| S186C-A239C              | 186 SER                          | 239 ALA | 18.10           |
| Y148C-S392C              | 148 TYR                          | 392 SER | 5.60            |
| 193C-L232C               | 193 CYS                          | 232 LEU | 4.60            |
| F156C-A191C              | 156 PHE                          | 191 ALA | 3.00            |
| C226-C296 <sup>#</sup>   | 226 CYS                          | 296 CYS | 2.40            |
| A162C-A399C              | 162 ALA                          | 399 ALA | 2.30            |
| L218C-L224C              | 218 LEU                          | 224 LEU | 1.40            |
| A158C-A399C              | 158 ALA                          | 399 ALA | 0.90            |
| I317C-G361C <sup>*</sup> | 317 ILE                          | 361 GLY | 0.80            |
| V246C-Y269C              | 246 VAL                          | 269 TYR | 0.70            |
| I147C-S389C              | 147 ILE                          | 389 SER | 0.70            |
| L218C-S223C              | 218 LEU                          | 223 SER | 0.60            |
| Y152C-A191C              | 152 TYR                          | 191 ALA | 0.50            |
| M340C-D344C              | 340 MET                          | 344 ASP | 0.50            |
| S155C-L396C              | 155 SER                          | 396 LEU | 0.50            |
| L144C-F385C              | 144 LEU                          | 385 PHE | 0.40            |

<sup>#</sup> endogenous disulfide bond

<sup>\*</sup>engineered disulfide bond



**Supplementary table 4 | Data collection and refinement statistics (BRIL)**

|                                                             | BRIL<br>(PDB code)        | T9C-A36C<br>(PDB code)    | V16C-A29C<br>(PDB code)   | A20C-Q25C<br>(PDB code)   | K27C-A79C<br>(PDB code)   |
|-------------------------------------------------------------|---------------------------|---------------------------|---------------------------|---------------------------|---------------------------|
| <b>Data collection</b>                                      |                           |                           |                           |                           |                           |
| Space group                                                 | C222 <sub>1</sub>         | C222 <sub>1</sub>         | C222 <sub>1</sub>         | C12 <sub>1</sub>          | C222 <sub>1</sub>         |
| Cell dimensions                                             |                           |                           |                           |                           |                           |
| <i>a</i> , <i>b</i> , <i>c</i> (Å)                          | 41.85,<br>51.16, 89.95    | 41.76,<br>50.84, 89.69    | 40.33,<br>50.13, 94.24    | 71.66,<br>120.87, 95.25   | 41.77,<br>51.29, 89.89    |
| <i>a</i> , <i>β</i> , <i>γ</i> (°)                          | 90.00,<br>90.00, 90.00    | 90.00,<br>90.00, 90.00    | 90.00,<br>90.00, 90.00    | 90.00,<br>90.04, 90.00    | 90.00,<br>90.00, 90.00    |
| Wavelength (Å)                                              | 0.9793                    | 0.9793                    | 0.9793                    | 0.9793                    | 0.9793                    |
| Resolution (Å) <sup>a</sup>                                 | 44.97-1.56<br>(1.62-1.56) | 30.37-1.30<br>(1.33-1.30) | 31.42-1.70<br>(1.76-1.70) | 37.70-2.20<br>(2.28-2.20) | 32.39-1.37<br>(1.42-1.37) |
| <i>R</i> <sub>merge</sub> (%)                               | 5.8 (21.7)                | 7.2(43.1)                 | 6.1(10.2)                 | 7.4 (38.7)                | 7.2 (54.6)                |
| Mean <i>I</i> / <i>σ</i> ( <i>I</i> )                       | 39.06(8.89)               | 61.49(5.26)               | 55.71(16.88)              | 12.35(2.55)               | 45.75(2.10)               |
| Completeness (%)                                            | 99.9(100)                 | 77.1(60.0)                | 95.4(90.7)                | 99.0(91.0)                | 99.5(95.4)                |
| Redundancy                                                  | 6.9(7.0)                  | 11.6(6.6)                 | 4.4(2.2)                  | 3.7(2.7)                  | 12.8(5.9)                 |
| <b>Refinement</b>                                           |                           |                           |                           |                           |                           |
| Resolution (Å)                                              | 44.97-1.56                | 30.37-1.30                | 31.42-1.70                | 37.70-2.20                | 32.39-1.37                |
| <i>R</i> <sub>work</sub> (%) / <i>R</i> <sub>free</sub> (%) | 19.7/23.8                 | 21.3/23.7                 | 15.5/18.8                 | 22.1/26.7                 | 18.1/21.2                 |
| Average B factors (Å <sup>2</sup> )                         |                           |                           |                           |                           |                           |
| Protein                                                     | 22.79<br>21.59            | 26.39<br>25.48            | 19.71<br>16.20            | 48.09<br>48.46            | 23.04<br>21.48            |
| R.m.s. deviations                                           |                           |                           |                           |                           |                           |
| Bond lengths (Å)                                            | 0.002                     | 0.006                     | 0.008                     | 0.008                     | 0.008                     |
| Bond angles (°)                                             | 0.46                      | 0.86                      | 0.71                      | 0.92                      | 0.86                      |
| Ramachandran Plot                                           |                           |                           |                           |                           |                           |
| Statistics (%)                                              |                           |                           |                           |                           |                           |
| Favored regions                                             | 99.04                     | 99.05                     | 100.00                    | 98.00                     | 99.09                     |
| Allowed regions                                             | 0.96                      | 0.95                      | 0.00                      | 1.70                      | 0.91                      |
| Outliners (%)                                               | 0.00                      | 0.00                      | 0.00                      | 0.30                      | 0.00                      |

<sup>a</sup> Values in parentheses are for highest-resolution shell.

**Supplementary table 5 | Data collection and refinement statistics (Flavodoxin)**

|                                                             | Flavodoxin<br>(PDB code)  | N14C-C93<br>(PDB code)    | A43C-L74C<br>(PDB code)   | C102-R125C<br>(PDB code)  |
|-------------------------------------------------------------|---------------------------|---------------------------|---------------------------|---------------------------|
| <b>Data collection</b>                                      |                           |                           |                           |                           |
| Space group                                                 | P12 <sub>1</sub> 1        | P12 <sub>1</sub> 1        | P12 <sub>1</sub> 1        | P12 <sub>1</sub> 1        |
| Cell dimensions                                             |                           |                           |                           |                           |
| <i>a</i> , <i>b</i> , <i>c</i> (Å)                          | 32.23,<br>56.26, 41.06    | 32.61,<br>56.32, 41.42    | 32.45,<br>56.13, 40.95    | 32.30,<br>56.07, 41.33    |
| <i>a</i> , <i>β</i> , <i>γ</i> (°)                          | 90.00,<br>100.84, 90.00   | 90.00,<br>101.63, 90.00   | 90.00,<br>101.03, 90.00   | 90.00,<br>100.56, 90.00   |
| Wavelength (Å)                                              | 0.9793                    | 0.9793                    | 0.9793                    | 0.9793                    |
| Resolution (Å) <sup>a</sup>                                 | 27.59-1.28<br>(1.32-1.28) | 28.16-1.55<br>(1.58-1.55) | 32.68-1.35<br>(1.40-1.35) | 40.63-1.50<br>(1.55-1.50) |
| <i>R</i> <sub>merge</sub> (%)                               | 8.9(51.7)                 | 19.3(64.9)                | 9.8(44.0)                 | 11.4(39.7)                |
| Mean <i>I</i> / <i>σ</i> ( <i>I</i> )                       | 32.21(2.72)               | 21.67(5.77)               | 26.21(2.73)               | 15.76(3.33)               |
| Completeness (%)                                            | 94.5(90.3)                | 98.7(98.6)                | 98.0(96.8)                | 98.4(99.0)                |
| Redundancy                                                  | 4.4(3.1)                  | 5.5(4.4)                  | 4.3(2.1)                  | 3.6(3.5)                  |
| <b>Refinement</b>                                           |                           |                           |                           |                           |
| Resolution (Å)                                              | 27.59-1.28                | 28.16-1.55                | 32.68-1.35                | 40.63-1.50                |
| <i>R</i> <sub>work</sub> (%) / <i>R</i> <sub>free</sub> (%) | 16.6/17.7                 | 15.3/18.0                 | 16.7/18.2                 | 17.3/19.3                 |
| Average B factors (Å <sup>2</sup> )                         | 19.24                     | 16.15                     | 17.95                     | 18.26                     |
| Protein                                                     | 16.39                     | 13.85                     | 15.30                     | 15.40                     |
| Ligand                                                      | 20.96                     | 21.69                     | 17.56                     | 15.86                     |
| R.m.s. deviations                                           |                           |                           |                           |                           |
| Bond lengths (Å)                                            | 0.010                     | 0.016                     | 0.006                     | 0.007                     |
| Bond angles (°)                                             | 1.12                      | 1.59                      | 0.79                      | 0.90                      |
| Ramachandran Plot<br>Statistics (%)                         |                           |                           |                           |                           |
| Favored regions                                             | 99.33                     | 99.34                     | 98.70                     | 99.33                     |
| Allowed regions                                             | 0.67                      | 0.66                      | 1.30                      | 0.67                      |
| Outliers (%)                                                | 0.00                      | 0.00                      | 0.00                      | 0.00                      |

<sup>a</sup> Values in parentheses are for highest-resolution shell.

## MATERIALS AND METHODS

### Data sets

We chose 4,722 non-redundant protein structures from PDB with sequence identity <90% that contained at least one disulfide bond. Those structures were obtained using X-ray crystallography and the resolution of those experimental diffraction data is better than 2.5 Å. We then extracted the list of those native disulfide bonds from PDB header files of these non-redundant protein structures. Finally, 18,696 native disulfide bonds were collected from PDB, in which 241 disulfide bonds were from membrane proteins. The data were divided into training (90%) and validation (10%) samples.

### Performance measure of the algorithm

The performance of connection prediction was evaluated by inputting the test set into our model and introducing artificial disulfides into BRIL and Flavodoxin. We also took into account the DSE (Yi and Khosla, 2016), and the probability of the neighbor preference to evaluate the output results of our models. The neighbor residue preference and the solvent accessibilities were calculated using Visual Molecular Dynamics (VMD) (Humphrey et al., 1996). To calculate the value of DSE, the form of empirical formula is (Bryan Schmidt, 2006; Schmidt et al., 2006):

$$\begin{aligned} DSE(kJ/mol) = & 8.37 \times (1 + \cos 3(\chi_1)) + 8.37 \times (1 + \cos 3(\chi_5)) \\ & + 4.18 \times (1 + \cos 3(\chi_2)) + 4.18 \times (1 + \cos 3(\chi_4)) \\ & + 14.64 \times (1 + \cos 2(\chi_3)) + 2.51 \times (1 + \cos 3(\chi_3)) \end{aligned}$$

The neighbor preference was calculated by

$$Prob_{(enviro)} = \frac{P_1 + P_2 + \dots + P_N}{N}$$

where N is the order of neighbor residue; P is the probability of occurrence for possible amino acid characterized by statistics analysis;  $Prob_{(enviro)}$  is the

probability of the neighbor preference of potential mutant sites.

### **Prediction algorithm**

The  $P_{Geom}$  is defined as the following:

$$P_{Geom} = P_{C\beta} \times P_O \times P_{C/C\alpha/C\beta} \times P_{C\alpha/C\beta/N} \times P_{C/C\alpha/N}$$

where the  $P_{C\beta}$  and  $P_O$  are distance distribution probabilities between paired  $C\beta$  and carbonyl O of disulfide bonding cysteines, respectively, while  $P_{C/C\alpha/C\beta}$ ,  $P_{C/C\alpha/C\beta}$  and  $P_{C\alpha/C\beta/N}$  represent the dihedral angle distribution probabilities between paired corresponding planes.  $P_{\Delta S}$  is defined as the following:

$$P_{\Delta S} = -2.1 - \frac{3}{2} R \ln(n)$$

where  $n$  is the number of residues closed by loop resulted by the new disulfide bond and  $R$  is the universal gas constant (Pace et al., 1988).

The clustering of geometrical difference of disulfide bonds from the PDB was detected by MMTSB (Multiscale Modeling Tools for Structural Biology) and assessed by RMSD (Feig et al., 2004). The formula for calculating  $P_{RMSD}$  is:

$$P_{RMSD} = \sqrt{\frac{\sum_{i=1}^n (X_{obs,i} - X_{model,i})^2}{n}}$$

where  $X_{obs,i}$  is the object value,  $X_{model,i}$  is the value from the statistics analysis and  $n$  represent the number of structure of disulfide bonds from our data set. By using hierarchical clustering algorithm based on RMSD, six clusters from the dataset were generated. The RMSD between those six cluster centers and the target positions are calculated.

### **Molecular Dynamics Simulations**

To investigate the changes of the mutated BRIL and Flavodoxin structures under room temperature 303K, we performed all atom molecular dynamics simulations for each system. The crystal structures were used as the starting conformation, and the

simulation systems were constructed using Charmm-GUI Webserver (Jo et al., 2008; Lee et al., 2016). Constant pressure and temperature (NPT) MD simulations were performed with integration time step of 2 femtoseconds. Charmm36 force field (Mallajosyula et al., 2012) was used for the modeling of systems, and simulation trajectories were generated by using Gromacs 5.1.2 (Berendsen et al., 1995; Lindahl et al., 2001). The rectangular water box was added to ensure that the distance from protein to edge of box is 20 Å. We used TIP3P as the water model to solvate protein systems. Sodium chloride ions were added to neutralize the systems and excess ions were used to obtain ion concentration of 150 mM NaCl. The temperature is controlled by Nosé-Hoover thermostat at 303K (Nosé, 1984; Hoover, 1985). The disulfide bonds for mutants were connected manually to generate the appropriate models. The simulation trajectories are equivalent to 200 nano seconds for each system.

### **Plasmid construction**

The full-length BRIL and Flavodoxin genes were amplified from pfastbac plasmid (synthesized by GENEWIZ). The resultant gene fragments were ligated into pMCSG7 encoding His-TEV-BRIL and His-TEV-Flavodoxin. Mutations were designed based on this plasmid pMCSG7-BRIL and pMCSG7-Flavodoxin by using a QuikChange<sup>TM</sup> site-directed mutagenesis kit following the manufacturer's instructions (Stratagene, La Jolla, CA, USA). All the plasmids were confirmed by sequencing. The construct, expression, purification and crystallization of GLP-1R were described elsewhere (Song et al., 2017).

### **Protein Purification**

*Escherichia coli* strain BL21-DE3 containing plasmid of protein with His-tag and mutations were grown while shaking (250 rpm) at 37°C in 1L of Luria-Bertani medium supplemented with ampicillin (100 µg/mL) until the optical density at 600

nm reached 1.2–1.5, at which time 1 mM isopropyl- $\beta$ -D-thiogalactoside was added. The culture was grown overnight at 16°C and harvested by centrifugation for 30 min at 6000 $\times$ g. The cell pellet was resuspended in 40 mL of 50 mM Tris-HCl and 150 mM NaCl buffer at pH 8.0. The cells were then lysed by sonication (Noise Isolation Chamber, SCIENTZ), and the lysate was cleared by centrifugation at 20,000 rpm for 30 min. Cell lysate was applied onto a Ni column equilibrated with 50 mM Tris-HCl and 150 mM NaCl buffer at pH 8.0, and the Ni column was washed with 3 column volume (CV) washing buffer A containing 50 mM Tris-HCl, 150 mM NaCl and 30 mM imidazole, and 3 CV washing buffer B containing 50 mM Tris-HCl, 150 mM NaCl and 50 mM imidazole. The protein was then eluted with elution buffer containing 50 mM Tris-HCl, 150 mM NaCl and 300 mM imidazole. The eluted solution was desalted and concentrated by ultrafiltration in an Amicon cell with a 3K MWCO membrane, YM3 (Amicon) in 50 mM Tris-HCl and 150 mM NaCl at pH 8.0. Then the TEV protease was added into the protein solution with a molar ratio of 1:50, and placed at 4°C overnight.

After detected by protein gel electrophoresis, the protein and TEV protease mixture was added into a new Ni column and the protein was collected in the flow through, then the protein was concentrated to less than 1 ml before loaded to the gel filtration column Superdex 75 10/300GL column (GE Healthcare). The purified homogenous BRIL and Flavodoxin proteins were collected and concentrated to 15-25 mg/ml in buffer 50 mM Tris-HCl (pH 8.0) and 20 mM NaCl.

### **Crystallization and data collection**

The WT BRIL and its mutants were crystallized by the hanging drop diffusion technique. The protein, at a concentration of 15-25 mg/ml, was stored in 50 mM Tris-HCl (pH 8.0) and 20 mM NaCl. The well solution contains 3.2 M ammonium sulfate,

0.1 M bicine (pH 9.0) N-octanoylsucrose (Reagent 17 of the Detergent Screen, Hampton Research) was added to the crystallization drops to a final concentration of 2.44 mM (Chu et al., 2002). The final volume of crystallization drops was 4  $\mu$ l, containing protein solution, well solution, and additive solution at a ratio of 5:4:1 (by vol.). The WT Flavodoxin and its mutants were also crystallized by the hanging drop diffusion technique. Crystals of Flavodoxin were grown in a buffer containing 3.1 M or 3.2 M  $(\text{NH}_4)_2\text{SO}_4$  and 0.1 M Tris-HCl pH 7.5 or pH 7.0 (Ross A. Reynolds, 2001). High diffraction crystals of Flavodoxin appeared after 3-4 weeks with concentrations between 15 and 20 mg/ml. Crystals were frozen in liquid nitrogen prior to diffraction testing and data collection.

#### **Data processing and structure determination**

Native diffraction data were collected at a wavelength of 0.979 Å at beamline BL17U1 at SSRF. The dataset was indexed, integrated, and scaled using the HKL2000 software package (Otwinowski and Minor, 1997). The structure was solved by molecular replacement method (McCoy et al., 2007) using wild-type BRIL (PDB:1M6T) and Flavodoxin (PDB: 1J8Q) as search models respectively. Refinement was carried out using PHENIX Refine (Adams et al., 2010). The refinement parameters were summarized in Supplementary Table 1 and 2.

#### **Mass Spectrum experiment**

The protein samples were diluted with PBS to adjust to final disulfide concentration of 40  $\mu$ M in 1 ml volume. After addition of 50  $\mu$ l 4 mM DTDP reagent, the sample was immediately mixed and the mix sample reacted in room temperature for 2 h. Then the sample was injected into 6320 TOF LC/MS system (Agilent Technologies, USA). The data were analyzed by using Agilent MassHunter Qualitative analysis.

Adams, P.D., Afonine, P.V., Bunkoczi, G., Chen, V.B., Davis, I.W., Echols, N., Headd, J.J., Hung, L.W., Kapral, G.J., Grosse-Kunstleve, R.W., *et al.* (2010). PHENIX: a comprehensive Python-based system for macromolecular structure solution. *Acta Crystallogr D Biol Crystallogr* 66, 213-221.

Berendsen, H.J.C., van der Spoel, D., and van Drunen, R. (1995). GROMACS: A message-passing parallel molecular dynamics implementation. *Comp Phys Comm* 91, 43-56.

Bryan Schmidt, L.H., Philip J. Hogg (2006). Allosteric Disulfide Bonds. *Biochemistry* 45, 5.

Chu, R., Takei, J., Knowlton, J.R., Andrykovitch, M., Pei, W., Kajava, A.V., Steinbach, P.J., Ji, X., and Bai, Y. (2002). Redesign of a four-helix bundle protein by phage display coupled with proteolysis and structural characterization by NMR and X-ray crystallography. *J Mol Biol* 323, 253-262.

Feig, M., Karanicolas, J., and Brooks, C.L., 3rd (2004). MMTSB Tool Set: enhanced sampling and multiscale modeling methods for applications in structural biology. *J Mol Graph Model* 22, 377-395.

Hoover, W.G. (1985). Canonical dynamics: Equilibrium phase-space distributions. *Phys Rev A Gen Phys* 31, 1695-1697.

Humphrey, W., Dalke, A., and Schulten, K. (1996). VMD: visual molecular dynamics. *J Mol Graph* 14, 33-38, 27-38.

Jo, S., Kim, T., Iyer, V.G., and Im, W. (2008). CHARMM-GUI: a web-based graphical user interface for CHARMM. *J Comput Chem* 29, 1859-1865.

Lee, J., Cheng, X., Swails, J.M., Yeom, M.S., Eastman, P.K., Lemkul, J.A., Wei, S., Buckner, J., Jeong, J.C., Qi, Y., *et al.* (2016). CHARMM-GUI Input Generator for NAMD, GROMACS, AMBER, OpenMM, and CHARMM/OpenMM Simulations Using the CHARMM36 Additive Force Field. *J Chem Theory Comput* 12, 405-413.

Lindahl, E., Hess, B., and van der Spoel, D. (2001). GROMACS 3.0: A package for molecular simulation and trajectory analysis. *J Mol Mod* 7, 306-317.

Mallajosyula, S.S., Guvench, O., Hatcher, E., and Mackerell, A.D., Jr. (2012). CHARMM Additive All-Atom Force Field for Phosphate and Sulfate Linked to Carbohydrates. *J Chem Theory Comput* 8, 759-776.

McCoy, A.J., Grosse-Kunstleve, R.W., Adams, P.D., Winn, M.D., Storoni, L.C., and Read, R.J. (2007). Phaser crystallographic software. *J Appl Crystallogr* 40, 658-674.

Nosé, S. (1984). A unified formulation of the constant temperature molecular-dynamics methods. *Journal of Chemical Physics* 81, 511-519.

Otwinowski, Z., and Minor, W. (1997). [20] Processing of X-ray diffraction data collected in oscillation mode. *Methods Enzymol* 276, 307-326.

Pace, C.N., Grimsley, G.R., Thomson, J.A., and Barnett, B.J. (1988). Conformational stability and activity of ribonuclease T1 with zero, one, and two intact disulfide bonds. *J Biol Chem* 263, 11820-11825.

Ross A. Reynolds, a.W.W., Keith D. Watenpaughb (2001). Structures and comparison of the Y98H (2.0 Å) and Y98W (1.5 Å) mutants of flavodoxin (*Desulfovibrio vulgaris*). *Acta Cryst* 57, 9.

Schmidt, B., Ho, L., and Hogg, P.J. (2006). Allosteric disulfide bonds. *Biochemistry* 45, 7429-7433.

Song, G., Yang, D., Wang, Y., de Graaf, C., Zhou, Q., Jiang, S., Liu, K., Cai, X., Dai, A., Lin, G., *et al.* (2017). Human GLP-1 receptor transmembrane domain structure in complex with allosteric modulators. *Nature* 546, 312-315.

Yi, M.C., and Khosla, C. (2016). Thiol-Disulfide Exchange Reactions in the Mammalian Extracellular Environment. *Annu Rev Chem Biomol Eng* 7, 197-222.
